# Supplementary material for: Neoadjuvant PD-1/PD-L1 combined with CTLA-4 inhibitors for solid malignancies: a systematic review and meta-analysis
Source: Springer Nature journal article supplement (doi:10.1186/s12957-023-03212-5), 2023-11-06
Supplement: MOESM1 [file 26270552]

**Neoadjuvant PD-1/PD-L1 combined with CTLA-4 inhibitors for solid malignancies: A systematic review and meta-analysis**

Shuang Huang<sup>1</sup>, Gang Zheng<sup>2\*</sup>, Kai Yang<sup>3\*</sup>

<sup>1</sup> Department of Stomatology, Shapingba Hospital Affiliated to Chongqing University, No.44, Xiaolongkan New Street, Shapingba District, Chongqing 400030, China

<sup>2</sup> Anorectal Department, Chongqing Traditional Chinese Medicine Hospital, 6 Panxi 7 Road, Jiangbei District, Chongqing 400021, China

<sup>3</sup> Department of Oral and Maxillofacial Surgery, The First Affiliated Hospital of Chongqing Medical University, No.1, Youyi Road, Yuzhong District, Chongqing 400016, China

**Correspondence to:** cqfyk@hotmail.com (Kai Yang) and 1045534442@qq.com (Gang Zheng)

\* Those authors contributed equally to this work.

## *Supplementary Material*

### Supplementary Table

**Table S1.** Search results of electronic database and manual method.

| Database or website            | Strategy of searching                                                                                                                                                                                                                                                                                                                                                                                                                          | Latest retrieval time | Records |
|--------------------------------|------------------------------------------------------------------------------------------------------------------------------------------------------------------------------------------------------------------------------------------------------------------------------------------------------------------------------------------------------------------------------------------------------------------------------------------------|-----------------------|---------|
| Web of Science                 | (((((TS=("programmed death 1")) OR TS=("pd-1")) OR TS=("programmed death 1 ligand 1")) OR TS=("pd-11")) OR TS=(immunotherapy)) OR TS=(nivolumab)) OR TS=(pembrolizumab)) OR TS=(toripalimab)) OR TS=(camrelizumab)) OR TS=(durvalumab)) OR TS=(avelumab)) OR TS=(atezolizumab)) OR TS=(tremelimumab)) OR TS=(ipilimumab) AND ((TS=(neoadjuvant)) OR TS=(presurgical)) OR TS=(preoperative) AND (TS=(RCT )) OR TS=(randomized controlled trial) | March 17, 2023        | 374     |
| PubMed                         | (PD-1 OR PD-L1 OR CTLA-4 OR immunotherapy OR nivolumab OR pembrolizumab OR toripalimab OR camrelizumab OR durvalumab OR avelumab OR atezolizumab OR tremelimumab OR ipilimumab) AND (neoadjuvant OR presurgical OR preoperative OR perioperative) AND (cancer or carcinoma) AND (RCT OR (randomized controlled trial))                                                                                                                         | March 17, 2023        | 322     |
| Embase                         | ('programmed death 1 receptor'/exp OR 'programmed death 1 ligand 1'/exp OR 'pd-1' OR 'pd-11' OR 'ctla-4' OR 'immunotherapy' OR 'nivolumab' OR 'pembrolizumab' OR 'toripalimab' OR 'camrelizumab' OR 'durvalumab' OR 'avelumab' OR 'atezolizumab' OR 'tremelimumab' OR 'ipilimumab') AND ('neoadjuvant' OR 'presurgical' OR 'preoperative' OR 'perioperative') AND ('cancer' OR 'carcinoma') AND ('rct' OR 'randomized controlled trial')       | March 17, 2023        | 1394    |
| Cochrane Library               | (PD-1 OR PD-L1 OR CTLA-4 OR immunotherapy) AND (neoadjuvant OR presurgical OR preoperative OR perioperative) AND (cancer or carcinoma) AND (RCT OR (randomized controlled trial)) in Title Abstract Keyword                                                                                                                                                                                                                                    | March 17, 2023        | 690     |
| Clinical tral.gov              | ((PD-1 OR PD-L1 OR CTLA-4 OR immunotherapy) AND (neoadjuvant) in Other Terms                                                                                                                                                                                                                                                                                                                                                                   | March 17, 2023        | NA      |
| ASCO                           | (PD-1 OR PD-L1 OR CTLA-4 OR immunotherapy) AND (neoadjuvant OR presurgical OR preoperative OR perioperative) AND (cancer or carcinoma) AND (RCT OR (randomized controlled trial))                                                                                                                                                                                                                                                              | March 17, 2023        | NA      |
| ESMO                           | (PD-1 OR PD-L1 OR CTLA-4 OR immunotherapy) AND (neoadjuvant OR presurgical OR preoperative OR perioperative) AND (cancer or carcinoma) AND (RCT OR (randomized controlled trial))                                                                                                                                                                                                                                                              | March 17, 2023        | NA      |
| References of included studies | NA                                                                                                                                                                                                                                                                                                                                                                                                                                             | NA                    | NA      |

Abbreviation: NA, not applicable.

## Supplementary Figures

a

| Study                      | Random sequence generation (selection bias) | Allocation concealment (selection bias) | Blinding of participants and personnel (performance bias) | Blinding of outcome assessment (detection bias) | Incomplete outcome data (attrition bias) | Selective reporting (reporting bias) | Other bias |
|----------------------------|---------------------------------------------|-----------------------------------------|-----------------------------------------------------------|-------------------------------------------------|------------------------------------------|--------------------------------------|------------|
| A. Leary 2021              | +                                           | ?                                       | -                                                         | +                                               | +                                        | +                                    | ?          |
| Ahmed Omar Kaseb 2022      | +                                           | +                                       | -                                                         | +                                               | +                                        | +                                    | +          |
| Boris Sepesi 2022          | +                                           | ?                                       | -                                                         | ?                                               | +                                        | +                                    | +          |
| Hye Ryun Kim 2021          | +                                           | ?                                       | -                                                         | ?                                               | +                                        | +                                    | +          |
| Hyun-Sung Lee 2023         | +                                           | ?                                       | -                                                         | ?                                               | +                                        | +                                    | ?          |
| Jonathan D Schoenfeld 2020 | +                                           | +                                       | -                                                         | +                                               | +                                        | +                                    | +          |
| Jonathan D Schoenfeld 2022 | +                                           | +                                       | -                                                         | +                                               | +                                        | +                                    | +          |
| Renata Ferrarotto 2020     | +                                           | +                                       | -                                                         | ?                                               | +                                        | +                                    | +          |
| Rodabe N. Amaria 2018      | +                                           | +                                       | -                                                         | +                                               | +                                        | +                                    | +          |
| Tina Cascone 2021          | +                                           | ?                                       | -                                                         | +                                               | +                                        | +                                    | +          |

b

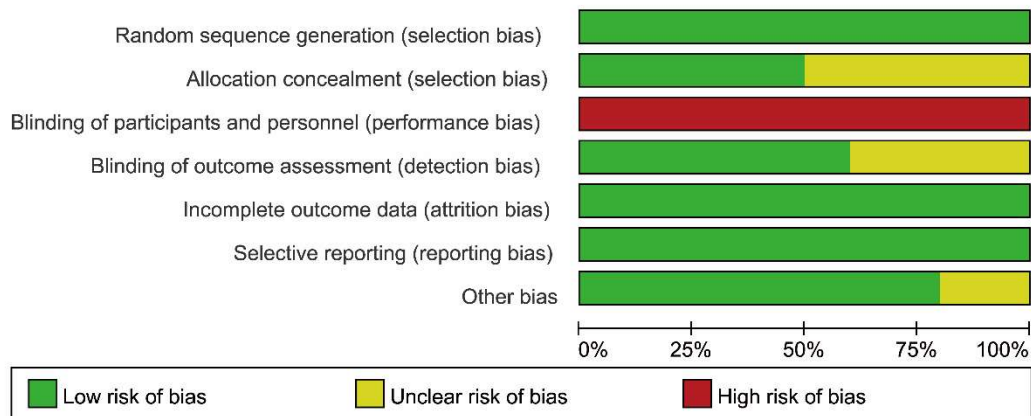

**Fig. S1:** Risk bias of the included studies. (a) each risk of bias item for included studies. (b) A summary table for each risk of bias item for each study.

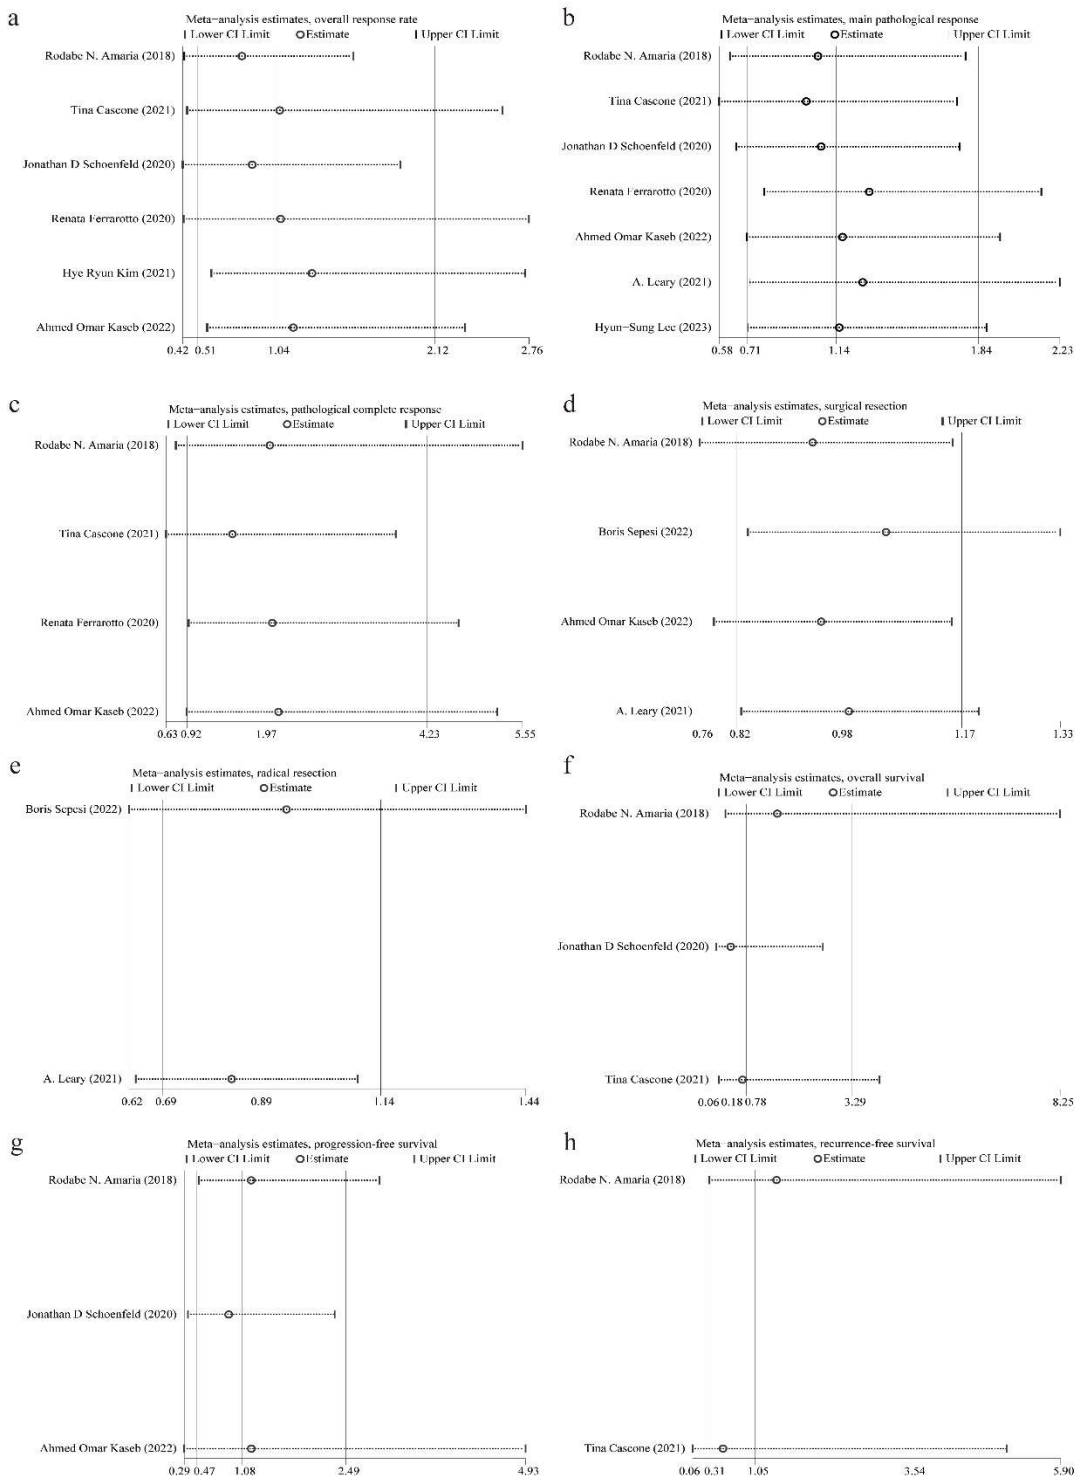

**Fig. S2:** Sensitivity analyses of efficacy outcomes. (a) Sensitivity analysis of overall response rate (ORR). (b) Sensitivity analysis of main pathological response (MPR). (c) Sensitivity analysis of pathological complete response (pCR). (d) Sensitivity analysis of surgical resection. (e) Sensitivity analysis of residual 0 resection (R0). (f) Sensitivity analysis of overall survival (OS). (g) Sensitivity analysis of progression-free survival (PFS). (h) Sensitivity analysis of recurrence-free survival (RFS).

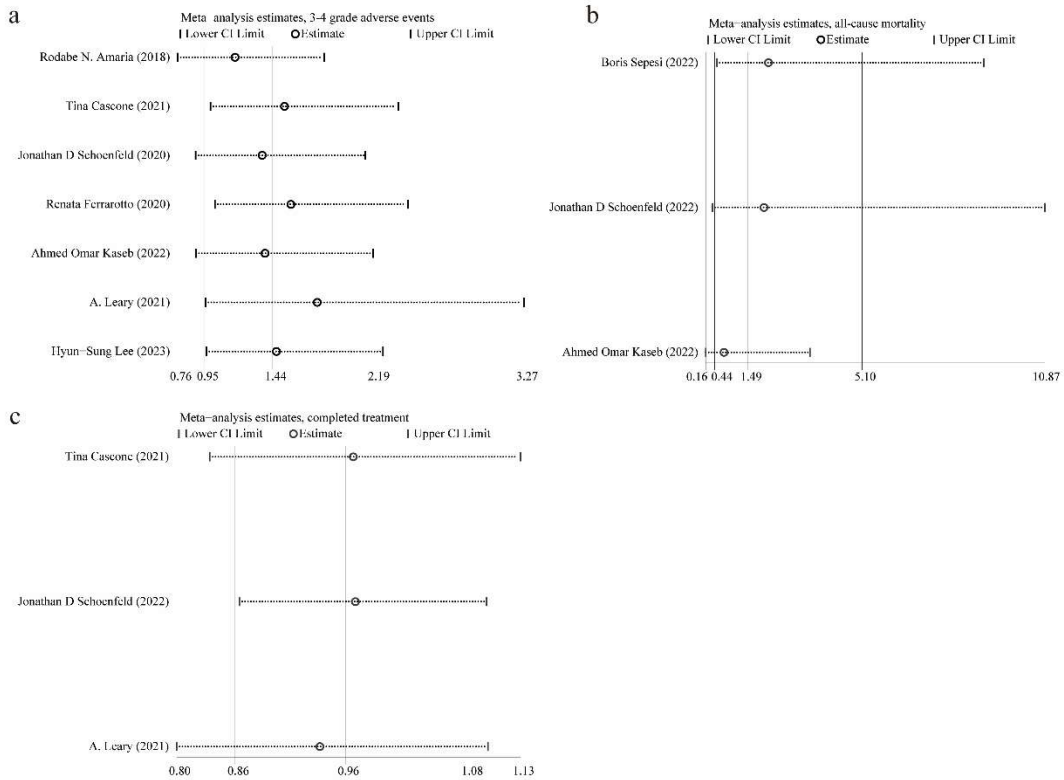

**Fig. S3:** Sensitivity analyses of safety outcomes. (a) Sensitivity analysis of grade 3-4 adverse events. (b) Sensitivity analysis of all-cause mortality. (c) Sensitivity analysis of completed treatment.
